# Super resolution imaging of a distinct chromatin loop in human lymphoblastoid cells

Jacqueline Jufen Zhu<sup>1,2\*</sup>, Zofia Parteka<sup>3,4\*</sup>, Byoungkoo Lee<sup>1</sup>, Przemyslaw Szalaj<sup>3,5,6</sup>, Ping Wang<sup>1</sup>, Karolina Jodkowska<sup>3</sup>, Jesse Aaron<sup>7</sup>, Teng-Leong Chew<sup>7</sup>, Dariusz Plewczynski<sup>3,4†</sup>, Yijun Ruan<sup>1,2,8†</sup>

## \*For correspondence:

[d.plewczynski@cent.uw.edu.pl](mailto:d.plewczynski@cent.uw.edu.pl) (DMP); [Yijun.Ruan@jax.org](mailto:Yijun.Ruan@jax.org) (YR)

\*These authors contributed equally to this work

†These authors also contributed equally to this work

**Present address:** <sup>5</sup>Department, Institute, Country; <sup>†</sup>Department, Institute, Country

<sup>1</sup>The Jackson Laboratory for Genomic Medicine, 10 Discovery Drive, Farmington, CT 06030, USA; <sup>2</sup>Department of Genetics and Genome Sciences, University of Connecticut Health Center, 400 Farmington Avenue, Farmington, CT 06030, USA; <sup>3</sup>Centre of New Technologies, University of Warsaw, S. Banacha 2c, 02-097 Warsaw, Poland; <sup>4</sup>Faculty of Mathematics and Information Science, Warsaw University of Technology, Warsaw, Poland; <sup>5</sup>Center for Bioinformatics and Data Analysis, Medical University of Bialystok, Jana Kilinskiego 1, 15-089 Bialystok, Poland; <sup>6</sup>I-BioStat, Hasselt University, Agoralaan D, 3590 Diepenbeek, Belgium; <sup>7</sup>Advanced Imaging Center, Janelia Research Campus, Howard Hughes Medical Institute, 19700 Helix Drive, Ashburn, VA 20147, USA; <sup>8</sup>National key laboratory of crop genetic improvement, College of Life Sciences and Technology, Huazhong Agricultural University, Wuhan, Hubei 430070, China

**Abstract** The three-dimensional genome structure plays a fundamental role in gene regulation and cellular functions. Recent studies in genomics based on sequencing technologies inferred the very basic functional chromatin folding structures of the genome known as chromatin loops, the long-range chromatin interactions that are often mediated by protein factors. To visualize the looping structure of chromatin we applied super-resolution microscopy iPALM to image a specific chromatin loop in GM12878 cells. Totally, we have generated six images of the target chromatin region at the single molecule resolution. To infer the chromatin structures from the captured images, we modeled them as looping conformations using different computational algorithms and then evaluated the models by comparing with Hi-C data to examine the concordance. The results showed a good correlation between the imaging data and sequencing data, suggesting the visualization of higher-order chromatin structures for the very short genomic segments can be realized by microscopic imaging.

## Introduction

How chromatin is organized in cell nucleus is a historically mysterious question. It is known that DNA is packed in different levels to allow meters-long linear DNA to be condensed in micrometers-sized nucleus. Bound by histone proteins, 146 base pairs (bp) of DNA form nucleosomes (*Luger et al., 1997; Tsunaka et al., 2005*) that are connected by dozens of bp of linker DNA, appearing as a “beads on a string” structure (*Olins and Olins, 1974; Kornberg, 1974; Oudet et al., 1975; Finch and Klug, 1976; Bustin et al., 1976; Leuba et al., 1994*). The 10 nm “beads on a string” DNA fiber is then folded into higher-order chromatin structures for further chromatin compaction. However,

40 the organization of higher-order chromatin structures was elusive for tens of years. Although the  
41 30 nm chromatin fiber was observed and suggested to be the next organizational level of the 10  
42 nm fiber, it is now debatable whether it exists *in vivo* (Felsenfeld and Groudine, 2003; van Holde  
43 and Zlatanova, 2007; Nishino et al., 2012). Recently, technologies combining biochemistry and  
44 high-throughput sequencing such as Hi-C (Lieberman-Aiden et al., 2009) and ChIA-PET (Fullwood  
45 et al., 2009) have been developed to characterize genome-wide landscape of long-range chromatin  
46 interactions (usually from several kilobases (kb) to hundreds of kilobases) that are considered as the  
47 basis of higher-order chromatin organization. Chromatin interactions suggest the looping structure  
48 of chromatin, describing DNA loci that are in close spatial proximity even though they are located  
49 far away in linear genomic distance. Based on chromatin interactions, more complex megabase-  
50 sized structures such as topologically associating domains (TADs) (Dixon et al., 2012; Ricci et al.,  
51 2015; Maeshima et al., 2014) and CTCF-mediated chromatin contact domains (CCDs) (Tang et al.,  
52 2015) were predicted. Importantly, these high-order structures were shown to be involved in tran-  
53 scription regulation (Pope et al., 2014; Apostolou and Thanos, 2008; Ling et al., 2006) and disease  
54 development (Lupiañez et al., 2015, 2016), suggesting critical biological importance. However, the  
55 visualization of these hypothesized higher-order chromatin structures *in situ* remains difficult mainly  
56 due to the resolution limitation of conventional microscopy. While electron microscopy has been  
57 previously used to visualize the ultrastructures and 3D organization of chromatin directly (Mahamid  
58 et al., 2016; Ou et al., 2017), it lacks specificity to investigate transcription associated chromatin  
59 structures. Fortunately, super-resolution light microscopy has made it possible to achieve this goal.  
60 Recently, stochastic optical reconstruction microscopy (STORM) has been used to image chromatin  
61 folding of TAD and different epigenetic states inferred by Hi-C (Wang et al., 2016; Boettiger et al.,  
62 2016). Given these developments, there comes now a more intriguing challenge to visualize a  
63 distinct chromatin loop. In this study, we applied interferometric fluorescent super-resolution  
64 microscopy (iPALM) combined with DNA fluorescence *in situ* hybridization (FISH) to visualize a  
65 distinct chromatin loop occurring frequently in human lymphoblastoid cells inferred by Hi-C and  
66 ChIA-PET chromatin contact data, which enabled us to resolve the very fine chromatin looping  
67 structures within 33kb of DNA.

## 68 Results

### 69 The chromatin landscape and DNA FISH design of the target loop region

70 Hi-C and ChIA-PET contact data showed chromatin loops at various genomic loci and length scales.  
71 As a target chromatin region we selected a 13kb long, high frequent **Table 1** loop mediated by both  
72 CTCF and RNAPII in GM12878 cells (**Figure 1b**). The loop is located at the T-cell receptor alpha (TCRA)  
73 locus on Chromosome 14, where V(D)J recombination takes place during T-lymphocyte development  
74 and has been studied in mouse T cells (Seitan et al., 2012, 2013; Shih et al., 2012). A CTCF- and  
75 cohesin-binding site is located between the TCRA locus and the neighbouring housekeeping gene  
76 DAD1. It is already suggested that this site functions as an insulator, as the depletion of cohesin  
77 leads to increased transcription of DAD1 (Seitan et al., 2011). Interaction between TCRA enhancer  
78 and Dad1 was shown to occur in both mouse T- and B-lymphocytes, although in the latter it was  
79 slightly weaker (Shih et al., 2012; Seitan et al., 2011). The conservation of TCRA locus in mouse and  
80 human (Glusman et al., 2001) implies a similar chromatin conformation in human lymphocytes with  
81 mouse. As expected, in our GM12878 ChIA-PET data, one anchor of the loop overlaps with TCRA  
82 enhancer, and the second one is situated in Dad1 gene body, which is similar to the observation in  
83 mouse T-cells, suggesting the insulation function of the target loop in human cells, adding biological  
84 meaning to the study on its detailed structure.

85 To keep the integrity of the loop in consideration of staining efficiency, we extended the selected  
86 region by 10kb on both sides. The resulting 33kb chromatin region is presented in both Hi-C heat  
87 map (**Figure 1a**) and ChIA-PET browser view (**Figure 1b**). The surrounding epigenomic landscape  
88 of this region is shown in **Figure 1-Figure Supplement 1**. We modeled the conformation of the

**Table 1.** GM12878 CTCF ChIA-PET top five strongest loops. The iPALM target loop, highlighted by bold font, is the third strongest CTCF loop over the whole genome. The total CTCF loop number is 42297, and the average PET count is 32.8. The minimum PET count of loops is 4.

| Chromosome   | Start           | End             | Chromosome      | Start           | End          | PET         |
|--------------|-----------------|-----------------|-----------------|-----------------|--------------|-------------|
| chr15        | 22436211        | 22436212        | chr15           | 22461064        | 22461065     | 5523        |
| chrX         | 9963956         | 9963957         | chrX            | 10087576        | 10087577     | 5239        |
| <b>chr14</b> | <b>23026053</b> | <b>23026054</b> | <b>23039387</b> | <b>23039388</b> | <b>chr14</b> | <b>2726</b> |
| chr11        | 130305008       | 130305009       | chr11           | 130732043       | 130732044    | 1644        |
| chr12        | 57607189        | 57607190        | chr12           | 57633076        | 57633077     | 1409        |

89 target region using sequencing data (*Figure 1c*). To this end, we used multidimensional scaling  
90 to estimate 3D chromatin structure of the loop region from Hi-C data. At the same time we  
91 applied iPALM to visualize it (*Figure 1d*). Oligopaints probe (*Beliveau et al., 2012*) for DNA FISH was  
92 designed to target on the chromatin (*Figure 1d*) specifically by avoiding DNA repeats, resulting a  
93 staining density of about 10 oligos/kb, allowing us to visualize the target chromatin as a dot by  
94 conventional microscope, though lacking details of the structuring, facilitating target localizing with  
95 iPALM imaging.

### 96 **Fine structures of the target chromatin revealed by iPALM imaging**

97 We applied iPALM (*Shtengel et al., 2009*) to image samples stained with Atto647N tagged probes  
98 (MYcroarray), which achieved single molecule resolution (*Figure 1e*). We acquired six high quality  
99 images for the target chromatin region (*Figure 1e*).

100 Briefly, samples were imaged at 30-50ms exposure, under 3kW/cm<sup>2</sup> of 647nm laser excitation  
101 and 100W/cm<sup>2</sup> 405nm laser activation for 25,000 frames to capture blinking Atto647N molecules.  
102 Data was imported into the PeakSelector software package (Janelia Research Campus), which  
103 registers three camera images with respect to each other, calibrates the intensity across each  
104 camera as a function of z-position, and localizes each blinking molecule in 3D. Further, fiducial  
105 nanoparticles embedded in the coverslip allow for drift correction after acquisition and localization  
106 to maximize image resolution. After the processing, spatial positions were filtered based on  
107 localization uncertainty in all three dimensions and data were rendered as 3D TIFF stacks for further  
108 analysis. Each image (*Figure 1e*) shows one copy of the 33 kb chromatin target. The well-separated  
109 red dots represent single fluorescent molecules bound along the chromatin. From the images, we  
110 can infer that the dots are not randomly distributed but ordered in some way to form featured  
111 spatial conformation. We then characterized each image by dot count, volume of the image, and  
112 the minimal distance between dots (*Figure 2a, b, c, Figure 2-Figure Supplement 1*). Volume of the  
113 image was estimated by calculating the volume of convex hull for dots identified from iPALM images  
114 (*Jones et al., 2014*). On average, there are 68 dots per image. The minimal distance between dots is  
115 in the range of 0-60nm, and the average image volume is 0.005  $\mu\text{m}^3$ . Interestingly, we observed  
116 significant differences in the distribution of dots, which suggests large structural heterogeneity of  
117 the chromatin at this scale.

### 118 **Reconstruction of the chromatin target by iPALM image modeling**

119 To better understand the visualized structures, we reconstructed the single chromatin loop from  
120 the pre-processed images. We demonstrated a new image processing algorithm *Figure 2-Figure*  
121 *Supplement 2* that identifies the coordinates of the single molecules from pre-processed iPALM  
122 images (*Figure 1e*) and returns points localizations in a PDB file format (*Figure 2a*), which can be  
123 used in further modeling. Basically, we extracted significant signals from the images. We measured  
124 the brightness of signals in relative luminosity units which range from 0 to 255. Brightness threshold  
125 was chosen manually to cut off noise. In this way, we got different sets of dots for each image.

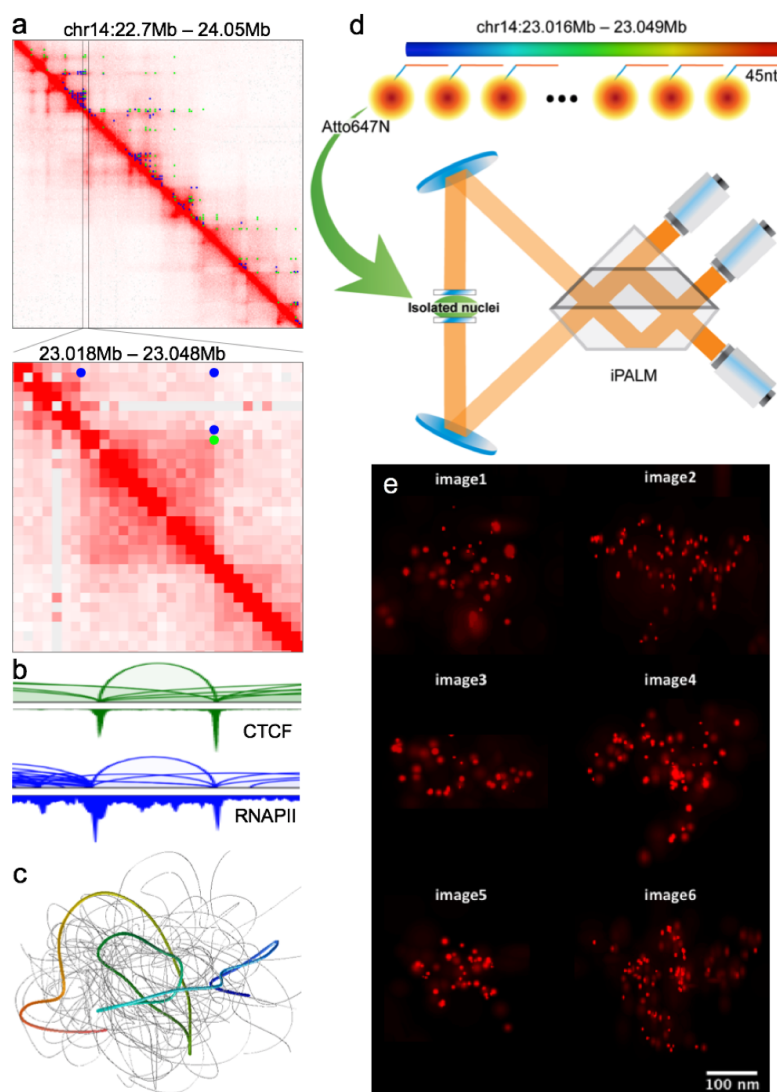

**Figure 1.** iPALM method to visualize a distinct chromatin loop. a. GM12878 Hi-C contact map (Rao et al., 2014) for chromosome 14: 22.7 – 24.05Mb (5kb resolution with balanced normalization, top) and zoomed-in target loop region (Chr14: 23.018 – 23.048Mb, 1kb resolution with balanced normalization, bottom). ChIA-PET loops (green for CTCF and blue for RNAPII) are also presented on top of the upper diagonal area of the contact map. b. GM12878 ChIA-PET genome browser view (Tang et al., 2015) for the target loop region (Chr14: 23.018 – 23.048Mb). CTCF loops and peaks (green) and RNAPII loops and peaks (blue) are presented. c. 3D chromatin models for the target loop region using Hi-C with multidimensional scaling method (Szalaj et al., 2016; Szalaj et al., 2016). Ensemble of 100 structures is presented. One typical model with a visible a loop structure is highlighted (rainbow color) d. Schematics of the iPALM method. The probe set contains 336 DNA oligos tagged with Atto647N designed to stain across the target loop region (Chr14: 23016081 – 23048740). e. Six observed iPALM images.

**Figure 1-Figure supplement 1.** Multi-scale view of the selected target loop region in GM12878. Three different scales over the target loop region are presented from the zoomed out view of 6.5Mb length (top row, Chr14: 20 – 26.5Mb), 1.35Mb length (middle row, Chr14: 22.7 – 24.05Mb), to the zoomed in view of 30Kb length (bottom row, Chr14: 23.018 – 23.048Mb). The first column is the genome browser view of CTCF and RNAPII ChIA-PET loops and peaks with CCDs (CTCF-mediated chromatin contact domains). The second and third column are 2D contact maps of ChIA-PET (CTCF and RNAPII merged) and Hi-C, respectively. ChIA-PET loops (green for CTCF and blue for RNAPII) are also presented on top of the upper diagonal area of the both ChIA-PET and Hi-C contact maps. Balanced normalization was applied to contact maps, and three different resolutions were used, 10kb (top row), 5kb (middle row), and 1kb (bottom row).

**Figure 1-video 1.** Three-dimensional projection of image 1.

**Figure 1-video 2.** Three-dimensional projection of image 2.

**Figure 1-video 3.** Three-dimensional projection of image 3

**Figure 1-video 4.** Three-dimensional projection of image 4

**Figure 1-video 5.** Three-dimensional projection of image 5

**Figure 1-video 6.** Three-dimensional projection of image 6

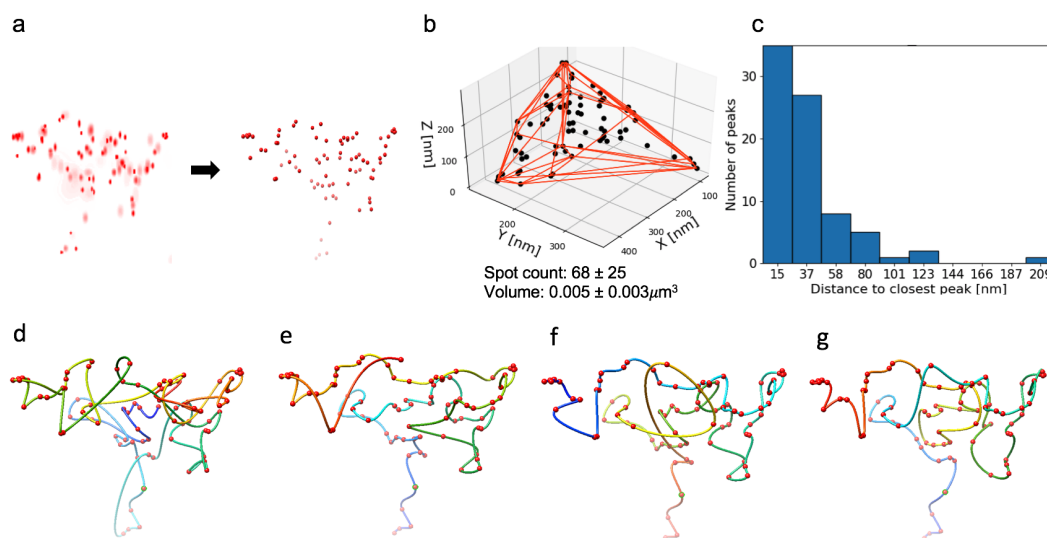

**Figure 2.** iPALM image-driven chromatin loop models for image 2. a. Dots are identified using iPALM signal processing algorithm in image 2 *Figure 1e*. The left is fluorescent signals from pre-processed image and the right is identified dots after processing. b. Identified dots with a convex hull represented by red lines are used to calculate the volume estimation for image 2. Dot counts and volume statistics for all six images are calculated. c. Distance histogram between two closest dots in image 2. iPALM image-based chromatin models are produced by four different connecting algorithms. d. neighbor joining, e. nearest neighbor 1, f. nearest neighbor 2, g. traveling salesman.

**Figure 2-Figure supplement 1.** Identified iPALM image dots for all six images. Identified dots with convex hull (red lines) and distance histogram between two closest dots for all six images.

**Figure 2-Figure supplement 2.** iPALM signal processing algorithm. The left panel is a schematic illustration to extract dots from the broad signal density image. Algorithm starts from the lowest brightness level and identifies connected components (A) in each connected component the brightest voxel is identified (B) then the brightness level is changed by a step size and the connected component analysis and brightest voxel identification is repeated until reaching the maximal brightness of the image (C,D). At the end all of identified voxels are connected into one set to avoid repetitions. Intermediate processed screenshots for image 6 were shown in the right panel. Brightest voxels identification in connected components found at different brightness levels (A,B,C,D,E) and all identified voxels merged into one set (F).

**Figure 2-video 1.** Three-dimensional projection of NJ model for image 1.

**Figure 2-video 2.** Three-dimensional projection of NN1 model for image 1.

**Figure 2-video 3.** Three-dimensional projection of NN2 model for image 1.

**Figure 2-video 4.** Three-dimensional projection of TSP model for image 1.

**Figure 2-video 5.** Three-dimensional projection of NJ model for image 2.

**Figure 2-video 6.** Three-dimensional projection of NN1 model for image 2.

**Figure 2-video 7.** Three-dimensional projection of NN2 model for image 2.

**Figure 2-video 8.** Three-dimensional projection of TSP model for image 2.

**Figure 2-video 9.** Three-dimensional projection of NJ model for image 3.

**Figure 2-video 10.** Three-dimensional projection of NN1 model for image 3.

**Figure 2-video 11.** Three-dimensional projection of NN2 model for image 3.

**Figure 2-video 12.** Three-dimensional projection of TSP model for image 3.

**Figure 2-video 13.** Three-dimensional projection of NJ model for image 4.

**Figure 2-video 14.** Three-dimensional projection of NN1 model for image 4.

**Figure 2-video 15.** Three-dimensional projection of NN2 model for image 4.

**Figure 2-video 16.** Three-dimensional projection of TSP model for image 4.

**Figure 2-video 17.** Three-dimensional projection of NJ model for image 5.

**Figure 2-video 18.** Three-dimensional projection of NN1 model for image 5.

**Figure 2-video 19.** Three-dimensional projection of NN2 model for image 5.

**Figure 2-video 20.** Three-dimensional projection of TSP model for image 5.

**Figure 2-video 21.** Three-dimensional projection of NJ model for image 6.

**Figure 2-video 22.** Three-dimensional projection of NN1 model for image 6.

**Figure 2-video 23.** Three-dimensional projection of NN2 model for image 6.

**Figure 2-video 24.** Three-dimensional projection of TSP model for image 6.



126 Number of points varied between images as well, ranging from 42 to 110 which is much smaller  
127 than the total number of probe oligos for each chromatin target. Several reasons could cause this  
128 under-stained effect: the chromatin is not ideally fully stained due to the FISH efficiency; some  
129 signals are lost during data processing.

130 We used three different algorithms to simulate and reconstruct the chromatin conformation.  
131 Each set of dots was connected using Neighbor Joining algorithm (NJ), Nearest Neighbor algorithm  
132 with two different starting positions (NN1 and NN2), and Traveling Salesman Problem solver (TSP).  
133 The obtained structures were smoothed using cubic spline interpolation (**Figure 2d,e,f,g**). Therefore,  
134 we got four probable structure models for each image. We then measured the linear length of these  
135 modeled structures (**Table 2**). Considering the probing density is in average of 10 fluorophore/kb,  
136 we were able to resolve the “beads on string” chromatin structure with around 150 bp per unit. As  
137 previously reported, the first level of DNA compaction from base pair backbone to histone modified  
138 “beads on string” structure is about five to ten fold condensation in size (**Felsenfeld and Groudine,**  
139 **2003**). Therefore, our 33kb target chromatin is estimated to be around 2244 nm to 4488 nm with  
140 the first level “beads on string” structure. Compared with our modeled DNA length **Table 2**, most of  
141 them are within the estimated range, only two of the images have slightly shorter length.

**Table 2.** Polymer length in nm

| Method | image 1 | image 2 | image 3 | image 4 | image 5 | image 6 |
|--------|---------|---------|---------|---------|---------|---------|
| NJ     | 2569.35 | 3481.72 | 1897.23 | 3218.16 | 1967.29 | 5346.97 |
| NN1    | 2320.08 | 2651.38 | 1562.75 | 3092.21 | 1743.19 | 3829.22 |
| NN2    | 2119.16 | 2730.49 | 1606.68 | 2592.97 | 1742.47 | 4013.24 |
| TSP    | 2038.64 | 2596.36 | 1383.92 | 2404.38 | 1417.93 | 3623.48 |

### 142 **iPALM image evaluation by comparing image models and Hi-C data**

143 To evaluate iPALM image-driven models, we first compared the distance matrix from 3D model with  
144 Hi-C contact matrix using 1kb resolution for 34kb length region (23,016,000 – 23,050,000). Figure  
145 3a shows the distance map of the NN1 model using image 2, as a typical loop structure. The 1kb  
146 bead-pairwise distance from 3D model varied from 0nm (darkest blue) to 402nm (dimmiest blue or  
147 white). Using the Hi-C map as a control (**Figure 3b**), the comparison map was produced in **Figure 3c**,  
148 measuring the fold change of the distance map to Hi-C contact map. To calculate the comparison  
149 map, we rescaled the distance map such that the minimum distance is the maximum value while  
150 the maximum distance is the minimum value with a linear interpolation, and then multiplying  
151 the distance map by the weighting factor so that the average value of the rescaled distance map  
152 is the same as the average value in Hi-C contact map across 34 x 34 matrix. White color in the  
153 comparison map represent the regions where both maps are similar, and red color those where  
154 the distance values are larger than Hi-C contact map values, whereas blue color the regions where  
155 Hi-C contact map values are larger than distance value in 3D model. The comparison map shows  
156 that the loop region of 3D model is similar to that in Hi-C, while 3D model shows higher value in  
157 off-diagonal region. Hi-C is a population averaged contact data from millions of cell, and signals  
158 randomly scattered in off-diagonal area or outside TAD regions are treated as noise, reduced by  
159 balanced normalization. On the other hand, individual iPALM image-driven models are based on  
160 each unique iPALM image, and the distance map shows strong off-diagonal value.

161 From Hi-C, and CTCF and RNAPII ChIA-PET data, we expect the strong 13kb loop region in  
162 the middle of target region and 10kb flanking region at each side of the target region. **Figure 3d**  
163 illustrates four different interaction groups in the target region using dotted arrows: intra-loop  
164 (yellow), intra-flank (purple), loop-flank (green), and inter-flank (red) for the 1kb bead pairwise  
165 physical distance in 3D models. The 3D physical distance from the image-driven model matched  
166 well with the genomic expectation, in **Figure 3e**. The intra-loop and intra-flank distances were

167 significantly lower than those for the loop-flank and inter-flank distances (**Figure 3e**). This effect  
168 was preserved when we removed the shortest contacts from the analysis.

169 For more comprehensive analysis, 3D scatter plot was produced by Hi-C frequency, genomic  
170 distance [kb], and physical distance [nm] in **Figure 3f**. Clearly, it shows that the intra-loop pairs  
171 are highest Hi-C frequency and closest physical distance, while pairwise interaction points spread  
172 toward lower Hi-C frequency and farther physical distance for intra-flank, loop-flank, and inter-flank,  
173 respectively. We generated four different 3D image-driven models for all six iPALM images and  
174 showed the results in the supplementary figure 4 – 9 **Figure 3–Figure Supplement 1, Figure 3–Figure**  
175 **Supplement 2, Figure 3–Figure Supplement 3, Figure 3–Figure Supplement 4, Figure 3–Figure Sup-**  
176 **plement 5, Figure 3–Figure Supplement 6**. The iPALM image-driven models show the dynamic and  
177 heterogeneous chromatin structures, but many models capture the major looping structure as  
178 the highest Hi-C frequency and the closest physical distance in the intra-loop interaction group,  
179 shown in the supplementary figure (**Figure 3–Figure Supplement 1, Figure 3–Figure Supplement 2,**  
180 **Figure 3–Figure Supplement 3, Figure 3–Figure Supplement 4, Figure 3–Figure Supplement 5, Fig-**  
181 **ure 3–Figure Supplement 6**).

## 182 Discussion

183 This is the first time a candidate chromatin loop is investigated and visualized using super-resolution  
184 microscopy. Though we expected to see a major looping structure in the target chromatin region  
185 inferred by ChIA-PET and Hi-C sequencing data, we observed more complex looping structures  
186 in each individual image that differentiate them from each other. There is a variety of possible  
187 reasons for the observation. 1. The chromatin loop could be heterogeneous between cells and  
188 alleles, or more dynamic than static in different cell stages. The captured loop suggested by  
189 ChIA-PET data indicates one of the preferred conformations that are occurring most frequently  
190 at that region. It does not mean that other conformations could not happen as those could  
191 be too rare to be captured. Our imaging data is not inclusive enough due to the limitation of  
192 the sample size to reflect the frequencies of each type of the looping incidences. 2. There are  
193 structures that cannot be captured by molecular strategies. Both ChIA-PET and Hi-C are based  
194 on a hypothesis that the chromatin interactions are mediated by protein factors. In other words,  
195 the chromatin structure that has no protein binding cannot be captured and modeled, but we  
196 cannot deny there are ultra complex twisting and tangling for DNA packing in the nucleus. This  
197 study allows a direct visualization of the chromatin looping in a specific region that we clearly  
198 see the physical winding of DNA, though there are limitations hindering us from interpreting the  
199 observations more comprehensively. For instances, we are not able to exactly link the iPALM images  
200 to the corresponding genome coordinates; we could not image the non-looping regions inferred by  
201 genome sequencing data; a larger sample size would be helpful bridging the gap of the comparison  
202 between individuals by imaging and populations by sequencing.

203 The imaging data is more direct and straightforward for revealing chromatin conformation  
204 than the sequencing data. Therefore, the observations or findings that are against or not in the  
205 agreement with our assumptions from the sequencing data are not unexpected, but even more  
206 suggestive to the current understanding the chromatin looping.

## 207 Methods and Materials

### 208 Cell culture

209 GM12878 cells were cultured in RPMI 1640 with 2mM L-glutamine and 15% fetal bovine serum at  
210 37 °C.

### 211 Nuclei isolation

212 Nuclei EZ Prep Nuclei Isolation Kit from Sigma was used to isolate nuclei from GM12878 cells.

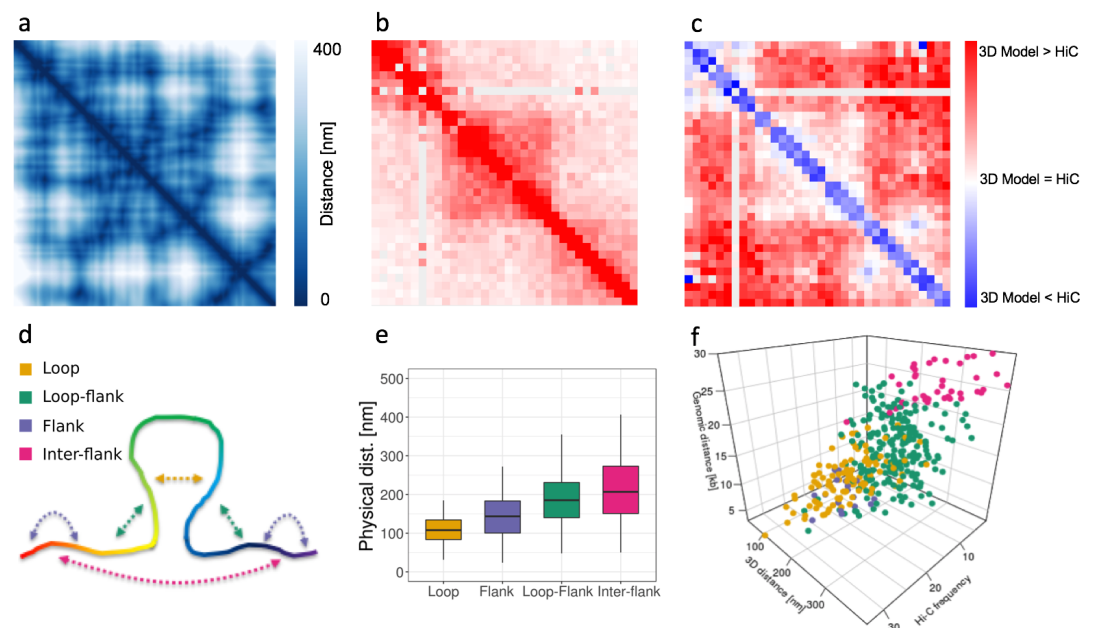

**Figure 3.** Image-driven model evaluation by comparing with Hi-C data. a. Distance map of NN1 model for image 2 *Figure 2e*. b. Hi-C contact map (chr14: 23.016-23.05Mb, 1kb resolution). c. Contrast map of *Figure 3a* and *Figure 3b*. d. Illustration of pairwise distance calculation, presenting four interaction groups: intra-loop interaction (yellow), intra-flank interaction (purple), loop-flank interaction (green), inter-flank interaction (red). e. Boxplots for physical distance of four interaction groups for image-driven model in *Figure 2e*. f. 3D scatter plot presenting the chromatin contact distribution with axis of genomic distance, physical distance, and Hi-C frequency.

**Figure 3-Figure supplement 1.** Image-driven 3D models, boxplots, and 3D scatter plots for four interaction groups (image 1).

**Figure 3-Figure supplement 2.** Image-driven 3D models, boxplots, and 3D scatter plots for four interaction groups (image 2).

**Figure 3-Figure supplement 3.** Image-driven 3D models, boxplots, and 3D scatter plots for four interaction groups (image 3).

**Figure 3-Figure supplement 4.** Image-driven 3D models, boxplots, and 3D scatter plots for four interaction groups (image 4).

**Figure 3-Figure supplement 5.** Image-driven 3D models, boxplots, and 3D scatter plots for four interaction groups (image 5)

**Figure 3-Figure supplement 6.** Image-driven 3D models, boxplots, and 3D scatter plots for four interaction groups (image 6).



## 213 **Coverslip coating**

214 Coverslips were incubated in 1M KOH for 20min, washed with water, coated with 0.01% poly-L-lysine  
215 (Sigma) for 20min, rinsed with water, dried for 30min for later use.

## 216 **DNA FISH**

217 Isolated nuclei were added to attach to poly-L-lysine coated coverslips, fixed with 4% PFA for 10min  
218 at room temperature, washed with 1xPBS, permeabilized with ice-cold methanol for 10min, washed  
219 with 1xPBS, dehydrated with 75%, 85% and 100% ethanol for 2min each, dried at 60°C for 1h. FISH  
220 probes were mixed with hybridization buffer and added to prepared nuclei, denatured at 80°C  
221 for 5min, incubated in a humid chamber at 37°C for overnight. Nuclei were washed with 50%  
222 formamide/2xSSC at room temperature for 10min, followed by 2xSSC for 10min, 0.2xSSC at 55°C  
223 for 10min and then large volume of 2xSSC till imaging.

## 224 **iPALM imaging**

225 Samples were imaged in standard stochastic optical reconstruction microscopy (STORM) buffer by  
226 iPALM (*Shtengel et al., 2009*). Isolated nuclei were adhered to 25mm round coverslips containing  
227 gold nanorod particles that act as calibration standards and alignment/drift fiducial markers. These  
228 were prepared as described in *Shtengel et al. (2014)*. Briefly, coverslips were washed for 3 hours at  
229 80 degrees C in a 5:1:1 solution of H<sub>2</sub>O:H<sub>2</sub>O<sub>2</sub>:NH<sub>3</sub>OH, rinsed copiously, and coated with poly-L-  
230 lysine. After further washing, gold nanorods (Nanopartz, Inc) were adhered to poly-L-lysine coated  
231 coverslips, washed again, and coated with ca. 50nm SiO<sub>2</sub> using a Denton vacuum evaporator.  
232 Samples were mounted in dSTORM buffer (*Dempsey et al., 2011*), containing tris buffered saline,  
233 pH 8, 100mM mercapto ethanolamine, 0.5 mg/mL glucose oxidase, 40 ug/mL catalase, and 10%  
234 (w/v) glucose (all from Sigma). An 18mm coverslip was adhered atop the bottom coverslip, sealed,  
235 mounted in the iPALM, and imaged as described above.

## 236 **Image pre-processing**

237 iPALM images were reconstructed via localization of blinking fluorophores over 25,000 frames  
238 across each of three EMCCD cameras. Gold nanoparticles act as fiducial markers that allow for  
239 (1) spatial registration of the three cameras using a full affine transformation, and (2) calibration  
240 of the z-position response of the system. After localization, images were filtered to only include  
241 localizations with <30nm uncertainty in all three dimensions. The gold fiducial particles also allow  
242 for drift correction in all three dimensions, and for correcting any sample tilt to within 30nm error.  
243 Final images were rendered as image stacks, reflecting the fluorophore density and uncertainty of  
244 localization, or exported as ASCII delimited text files for further analysis.

## 245 **Dots identification algorithm**

246 Here we propose the dot identification algorithm implemented to analyze post processed iPALM  
247 images. It analyzes three dimensional TIFF files in order to find coordinates of all visible dots (probe  
248 oligos attached to the chromatin). Based on a manually set brightness threshold it builds a three  
249 dimensional graph, represented as three dimensional matrix, where voxels of image are nodes.  
250 Edges are created between two voxels that are located next to each other and their brightness  
251 is higher than given threshold. Then the algorithm identifies all connected components in such  
252 graph. We define connected component as a part of the image in which all voxels form an area  
253 with brightness above cutoff level, which means that they are represented by nodes connected  
254 by vertices in created graph. In each connected component we identify a point by finding the  
255 XYZ coordinates of the brightest voxel. List of identified dots is remembered, brightness level  
256 is increased by a step size, new graph is created and the whole procedure is repeated until the  
257 algorithm reaches given maximal brightness level *Figure 2–Figure Supplement 2*. When the maximal  
258 brightness level is reached all identified dots are merged into one set (to avoid repetitions) and list

259 of coordinates of identified dots is returned and saved in PDB format. To the best of our knowledge  
260 this is the first approach to predict the dot location from 3D TIFF images.

### 261 **Dot-joining algorithms**

262 To comprehensively model the potential chromatin loop structure, we applied three different  
263 algorithms to render the models. After that we applied spline interpolation to smooth the models.

#### 264 **Neighbor Joining algorithm**

265 Neighbor Joining is an agglomerative clustering method used in bioinformatics for creation of  
266 phylogenetic trees. In our approach in each step the algorithm is searching for a pair of dots that  
267 are the closest to each other and connecting them in one. This step is repeated until there is no  
268 unconnected dots left. We used this approach to connect sets of identified dots from iPALM images.

#### 269 **Nearest Neighbor algorithm**

270 Nearest Neighbor algorithm is solving shortest path problem. Shortest path problem in graph  
271 theory is the problem of finding a path between two nodes such that the distance between them  
272 is minimized. Algorithm is starting from given dot, searching the nearest dot in surroundings,  
273 connecting them and again searching for the nearest neighbor and this way connecting a whole  
274 set of dots. After analyzing the genomic data we found out that examined loop is in between two  
275 subdomains. We assumed that flanking regions will be far apart from each other with the loop in  
276 the middle. We run two NN simulations each starting from one of two dots that were the furthest  
277 apart in space. Thus, this approach will generate two possible image models.

#### 278 **Travelling Salesman algorithm**

279 We used implementation of greedy algorithm finding one of the best solutions for this NP-hard  
280 problem. We treat our set of points as graph nodes, and distances between them as vertices. At  
281 the beginning each vertex is a separate path of length 1. In each step we are finding two closest  
282 disconnected paths, and we connect them into one. This step is repeated until there is just one  
283 path left. Greedy TSP solver gives highly non optimal results therefore after connecting all paths  
284 into one we run optimization algorithm. Optimization tries to rearrange dots in the path to improve  
285 the solution. After finding the shortest path we are simply deleting the longest connection between  
286 two dots. This way we get the shortest path between two dots that are the furthest from each  
287 other.

### 288 **Spline Interpolation**

289 Spline interpolation is class of interpolation which uses polynomials to create smooth function on  
290 interval  $[a, b]$ . This interval is split into  $m$  sub-intervals such as  $a = t_0 < t_1 < \dots < t_m = b$ . For each  
291 point  $t_i$  there is a defined value  $y_i$  throughout that the interpolation should go. For each of these  
292 intervals a different polynomial is used as defined, so they are connecting to a continuous function.  
293 The spline degree  $d$  uses such polynomials degree at maximum of  $d$  to satisfy the condition that  
294 derivatives on the whole interval  $[a, b]$  up to level  $d - 1$  are continuous. In our case we decided to  
295 use cubic splines. The degree limit is set to three.

We set a polynomial  $P_i$  on interval  $[t_i, t_{i+1}]$ , and got the following conditions:

$$P_0''(a) = 0 \quad (1)$$

$$P_{m-1}''(b) = 0 \quad (2)$$

$$P_i(t_i) = y_i \quad (3)$$

$$P_i(t_{i+1}) = y_{i+1} \quad (4)$$

$$P'_{i+1}(t_{i+1}) = P'_i(t_{i+1}) \quad (5)$$

$$P''_{i+1}(t_{i+1}) = P''_i(t_{i+1}) \quad (6)$$

$$(7)$$

296 We chose cubic spline interpolation because it gives an interpolating polynomial that is smoother  
297 and easier to compute than other methods. We used it to smooth structures modeled from iPALM  
298 images.

### 299 **Multidimensional scaling**

300 Multidimensional scaling (MDS) algorithm is a statistical method which takes matrix of similarities  
301 or distances between objects and put that objects in N-dimensional space possibly close to given  
302 distances (*Borg et al., 2017*). In particular we can use Hi-C/ChIA-PET relative frequency contact  
303 matrix into physical distances and seek for its representation in 3D space. In this case every bin in  
304 interaction matrix will represent a single bead in of a model in 3D. We used Hi-C contact matrix for  
305 studied region to obtain 3D chromatin models from genomic data. This matrix we interpreted as  
306 graph neighborhood matrix. Using this graph we calculated graph distance. The result was an input  
307 to MDS algorithm (Scikit implementation, *Pedregosa et al. (2011)*).

### 308 **Acknowledgements**

309 iPALM imaging was done in collaboration with the Advanced Imaging Center at Janelia Research  
310 Campus, a facility jointly supported by the Gordon and Betty Moore Foundation and the Howard  
311 Hughes Medical Institute. This work was carried out within the TEAM program of the Founda-  
312 tion for Polish Science (TEAM to D.P.) co-financed by the European Union under the European  
313 Regional Development Found, co-supported by OPUS grant from Polish National Science Centre  
314 (2014/15/B/ST6/05082) and the grant 1U54DK107967-01 "Nucleome Positioning System for Spa-  
315 tiotemporal Genome Organization and Regulation" within 4D Nucleome NIH program. The work  
316 was co-supported by the European Commission as European Cooperation in Science and Technol-  
317 ogy COST actions: CA18127 "International Nucleome Consortium" (INC), and CA16212 "Impact of  
318 Nuclear Domains On Gene Expression and Plant Traits". PS was supported by a PhD stipend from  
319 Polish National Science Center (2016/20/T/NZ2/00511).

### 320 **References**

- 321 **Apostolou E**, Thanos D. Virus Infection Induces NF- $\kappa$ B-Dependent Interchromosomal Associations Mediating  
322 Monoallelic IFN- $\beta$  Gene Expression. *Cell*. 2008; 134(1):85–96. [http://www.sciencedirect.com/science/article/](http://www.sciencedirect.com/science/article/pii/S0092867408007599)  
323 [pii/S0092867408007599](http://www.sciencedirect.com/science/article/pii/S0092867408007599), doi: <https://doi.org/10.1016/j.cell.2008.05.052>.
- 324 **Beliveau BJ**, Joyce EF, Apostolopoulos N, Yilmaz F, Fonseka CY, McCole RB, Chang Y, Li JB, Senaratne TN, Williams  
325 BR, et al. Versatile design and synthesis platform for visualizing genomes with Oligopaint FISH probes.  
326 *Proceedings of the National Academy of Sciences*. 2012; 109(52):21301–21306.
- 327 **Boettiger AN**, Bintu B, Moffitt JR, Wang S, Beliveau BJ, Fudenberg G, Imakaev M, Mirny LA, Wu Ct, Zhuang X.  
328 Super-resolution imaging reveals distinct chromatin folding for different epigenetic states. *Nature*. 2016;  
329 529(7586):418.
- 330 **Borg I**, Groenen PJ, Mair P. *Applied multidimensional scaling and unfolding*. Springer; 2017.
- 331 **Bustin M**, Goldblatt D, Sperling R. Chromatin structure visualization by immunoelectron microscopy. *Cell*. 1976;  
332 7(2):297–304.
- 333 **Dempsey GT**, Vaughan JC, Chen KH, Bates M, Zhuang X. Evaluation of fluorophores for optimal performance in  
334 localization-based super-resolution imaging. *Nature methods*. 2011; 8(12):1027.
- 335 **Dixon JR**, Selvaraj S, Yue F, Kim A, Li Y, Shen Y, Hu M, Liu JS, Ren B. Topological domains in mammalian genomes  
336 identified by analysis of chromatin interactions. *Nature*. 2012; 485(7398):376.
- 337 **Felsenfeld G**, Groudine M. Controlling the double helix. *Nature*. 2003; 421(6921):448.
- 338 **Finch J**, Klug A. Solenoidal model for superstructure in chromatin. *Proceedings of the National Academy of*  
339 *Sciences*. 1976; 73(6):1897–1901.
- 340 **Fullwood MJ**, Liu MH, Pan YF, Liu J, Xu H, Mohamed YB, Orlov YL, Velkov S, Ho A, Mei PH, et al. An oestrogen-  
341 receptor- $\alpha$ -bound human chromatin interactome. *Nature*. 2009; 462(7269):58.

- 342 **Glusman G**, Rowen L, Lee I, Boysen C, Roach JC, Smit AF, Wang K, Koop BF, Hood L. Comparative genomics of  
343 the human and mouse T cell receptor loci. *Immunity*. 2001; 15(3):337–349.
- 344 **van Holde K**, Zlatanova J. Chromatin fiber structure: Where is the problem now? In: *Seminars in cell &*  
345 *developmental biology*, vol. 18 Elsevier; 2007. p. 651–658.
- 346 **Jones E**, Oliphant T, Peterson P. {SciPy}: open source scientific tools for {Python}. . 2014; .
- 347 **Kornberg RD**. Chromatin structure: a repeating unit of histones and DNA. *Science*. 1974; 184(4139):868–871.
- 348 **Leuba SH**, Yang G, Robert C, Samori B, van Holde K, Zlatanova J, Bustamante C. Three-dimensional structure  
349 of extended chromatin fibers as revealed by tapping-mode scanning force microscopy. *Proceedings of the*  
350 *National Academy of Sciences*. 1994; 91(24):11621–11625.
- 351 **Lieberman-Aiden E**, Van Berkum NL, Williams L, Imakaev M, Ragozcy T, Telling A, Amit I, Lajoie BR, Sabo PJ,  
352 Dorschner MO, et al. Comprehensive mapping of long-range interactions reveals folding principles of the  
353 human genome. *science*. 2009; 326(5950):289–293.
- 354 **Ling JQ**, Li T, Hu JF, Vu TH, Chen HL, Qiu XW, Cherry AM, Hoffman AR. CTCF mediates interchromosomal  
355 colocalization between Igf2/H19 and Wsb1/Nf1. *Science*. 2006; 312(5771):269–272.
- 356 **Luger K**, Mäder AW, Richmond RK, Sargent DF, Richmond TJ. Crystal structure of the nucleosome core particle  
357 at 2.8 Å resolution. *Nature*. 1997; 389(6648):251.
- 358 **Lupiáñez DG**, Kraft K, Heinrich V, Krawitz P, Brancati F, Klopocki E, Horn D, Kayserili H, Opitz JM, Laxova R, et al.  
359 Disruptions of topological chromatin domains cause pathogenic rewiring of gene-enhancer interactions. *Cell*.  
360 2015; 161(5):1012–1025.
- 361 **Lupiáñez DG**, Spielmann M, Mundlos S. Breaking TADs: how alterations of chromatin domains result in disease.  
362 *Trends in Genetics*. 2016; 32(4):225–237.
- 363 **Maeshima K**, Imai R, Tamura S, Nozaki T. Chromatin as dynamic 10-nm fibers. *Chromosoma*. 2014 Jun;  
364 123(3):225–237. <https://doi.org/10.1007/s00412-014-0460-2>, doi: 10.1007/s00412-014-0460-2.
- 365 **Mahamid J**, Pfeffer S, Schaffer M, Villa E, Danev R, Cuellar LK, Förster F, Hyman AA, Plitzko JM, Baumeister W.  
366 Visualizing the molecular sociology at the HeLa cell nuclear periphery. *Science*. 2016; 351(6276):969–972.
- 367 **Nishino Y**, Eltsov M, Joti Y, Ito K, Takata H, Takahashi Y, Hihara S, Frangakis AS, Imamoto N, Ishikawa T, Maeshima  
368 K. Human mitotic chromosomes consist predominantly of irregularly folded nucleosome fibres without a  
369 30-nm chromatin structure. *The EMBO Journal*. 2012; 31(7):1644–1653. [http://emboj.embopress.org/content/](http://emboj.embopress.org/content/31/7/1644)  
370 [31/7/1644](http://emboj.embopress.org/content/31/7/1644), doi: 10.1038/emboj.2012.35.
- 371 **Olins AL**, Olins DE. Spheroid chromatin units ( $\nu$  bodies). *Science*. 1974; 183(4122):330–332.
- 372 **Ou HD**, Phan S, Deerinck TJ, Thor A, Ellisman MH, O’Shea CC. ChromEMT: Visualizing 3D chromatin structure  
373 and compaction in interphase and mitotic cells. *Science*. 2017; 357(6349):eaag0025.
- 374 **Oudet P**, Gross-Bellard M, Chambon P. Electron microscopic and biochemical evidence that chromatin structure  
375 is a repeating unit. *Cell*. 1975; 4(4):281–300.
- 376 **Pedregosa F**, Varoquaux G, Gramfort A, Michel V, Thirion B, Grisel O, Blondel M, Prettenhofer P, Weiss R,  
377 Dubourg V, et al. Scikit-learn: Machine learning in Python. *Journal of machine learning research*. 2011;  
378 12(Oct):2825–2830.
- 379 **Pope BD**, Ryba T, Dileep V, Yue F, Wu W, Denas O, Vera DL, Wang Y, Hansen RS, Canfield TK, et al. Topologically  
380 associating domains are stable units of replication-timing regulation. *Nature*. 2014; 515(7527):402.
- 381 **Rao SS**, Huntley MH, Durand NC, Stamenova EK, Bochkov ID, Robinson JT, Sanborn AL, Machol I, Omer AD,  
382 Lander ES, et al. A 3D map of the human genome at kilobase resolution reveals principles of chromatin  
383 looping. *Cell*. 2014; 159(7):1665–1680.
- 384 **Ricci M**, Manzo C, García-Parajo MF, Lakadamyali M, Cosma M. Chromatin Fibers Are Formed by Heterogeneous  
385 Groups of Nucleosomes InVivo. *Cell*. 2015; 160(6):1145 – 1158. [http://www.sciencedirect.com/science/article/](http://www.sciencedirect.com/science/article/pii/S0092867415001324)  
386 [pii/S0092867415001324](http://www.sciencedirect.com/science/article/pii/S0092867415001324), doi: <https://doi.org/10.1016/j.cell.2015.01.054>.
- 387 **Seitan VC**, Faure AJ, Zhan Y, McCord RP, Lajoie BR, Ing-Simmons E, Lenhard B, Giorgetti L, Heard E, Fisher AG,  
388 et al. Cohesin-based chromatin interactions enable regulated gene expression within preexisting architectural  
389 compartments. *Genome research*. 2013; .

- 390 **Seitan VC**, Hao B, Tachibana-Konwalski K, Lavagnoli T, Mira-Bontenbal H, Brown KE, Teng G, Carroll T, Terry A,  
391 Horan K, et al. A role for cohesin in T-cell-receptor rearrangement and thymocyte differentiation. *Nature*.  
392 2011; 476(7361):467.
- 393 **Seitan VC**, Krangel MS, Merckenschlager M. Cohesin, CTCF and lymphocyte antigen receptor locus rearrangement.  
394 *Trends in immunology*. 2012; 33(4):153-159.
- 395 **Shih HY**, Verma-Gaur J, Torkamani A, Feeney AJ, Galjart N, Krangel MS. Tcra gene recombination is supported  
396 by a Tcra enhancer-and CTCF-dependent chromatin hub. *Proceedings of the National Academy of Sciences*.  
397 2012; 109(50):E3493-E3502.
- 398 **Shtengel G**, Galbraith JA, Galbraith CG, Lippincott-Schwartz J, Gillette JM, Manley S, Sougrat R, Waterman CM,  
399 Kanchanawong P, Davidson MW, et al. Interferometric fluorescent super-resolution microscopy resolves 3D  
400 cellular ultrastructure. *Proceedings of the National Academy of Sciences*. 2009; 106(9):3125-3130.
- 401 **Shtengel G**, Wang Y, Zhang Z, Goh WI, Hess HF, Kanchanawong P. Imaging cellular ultrastructure by PALM,  
402 iPALM, and correlative iPALM-EM. In: *Methods in cell biology*, vol. 123 Elsevier; 2014.p. 273-294.
- 403 **Szalai P**, Michalski PJ, Wróblewski P, Tang Z, Kadlof M, Mazzocco G, Ruan Y, Plewczynski D. 3D-GNOME: an  
404 integrated web service for structural modeling of the 3D genome. *Nucleic acids research*. 2016; 44(W1):W288-  
405 W293.
- 406 **Szalai P**, Tang Z, Michalski P, Pietal MJ, Luo OJ, Sadowski M, Li X, Radew K, Ruan Y, Plewczynski D. An integrated  
407 3-dimensional genome modeling engine for data-driven simulation of spatial genome organization. *Genome*  
408 *research*. 2016; p. gr-205062.
- 409 **Tang Z**, Luo OJ, Li X, Zheng M, Zhu JJ, Szalai P, Trzaskoma P, Magalska A, Wlodarczyk J, Ruszczycki B, et al.  
410 CTCF-mediated human 3D genome architecture reveals chromatin topology for transcription. *Cell*. 2015;  
411 163(7):1611-1627.
- 412 **Tsunaka Y**, Kajimura N, Tate Si, Morikawa K. Alteration of the nucleosomal DNA path in the crystal structure of  
413 a human nucleosome core particle. *Nucleic Acids Research*. 2005; 33:3424-3434.
- 414 **Wang S**, Su JH, Beliveau BJ, Bintu B, Moffitt JR, Wu Ct, Zhuang X. Spatial organization of chromatin domains and  
415 compartments in single chromosomes. *Science*. 2016; p. aaf8084.



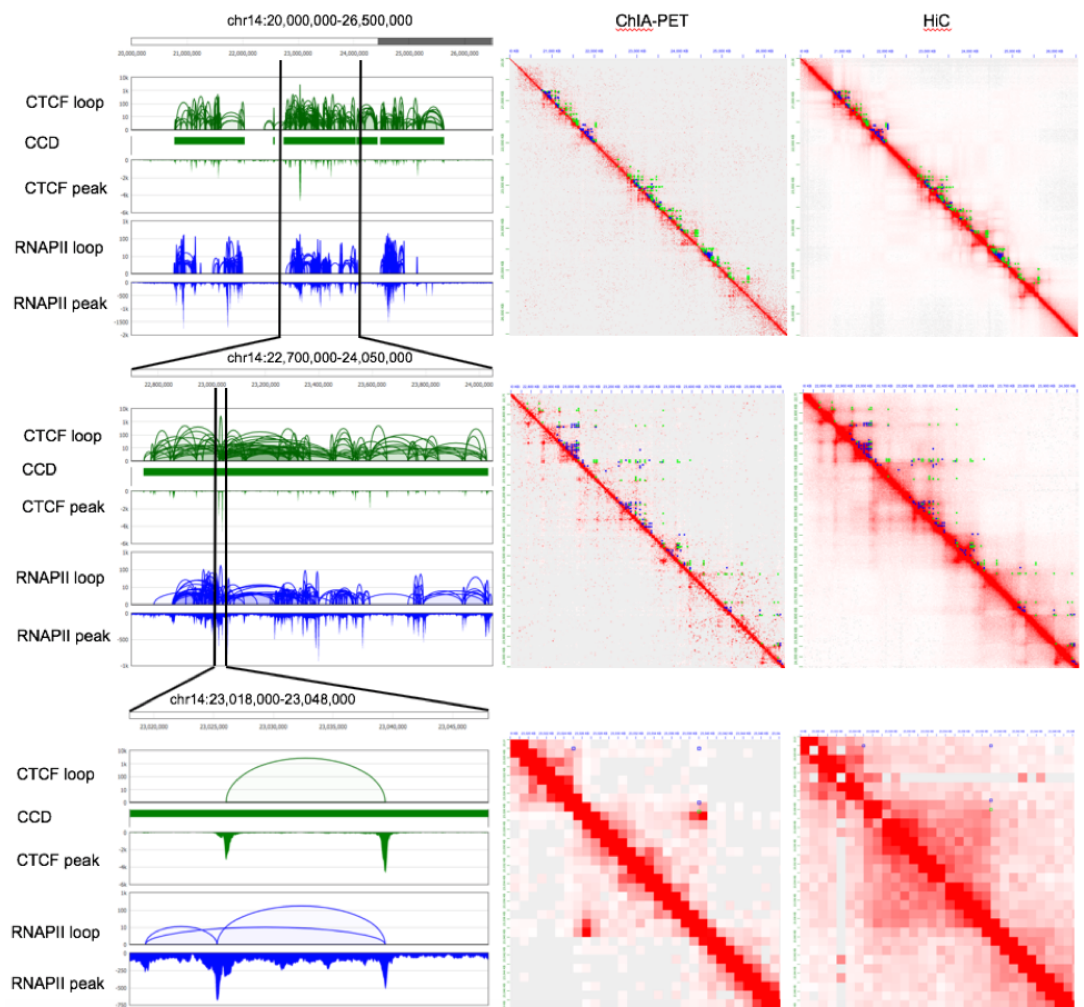

416

**Figure 1-Figure supplement 1.** Multi-scale view of the selected target loop region in GM12878. Three different scales over the target loop region are presented from the zoomed out view of 6.5Mb length (top row, Chr14: 20 – 26.5Mb), 1.35Mb length (middle row, Chr14: 22.7 – 24.05Mb), to the zoomed in view of 30kb length (bottom row, Chr14: 23.018 – 23.048Mb). The first column is the genome browser view of CTCF and RNAPII ChIA-PET loops and peaks with CCDs (CTCF-mediated chromatin contact domains). The second and third column are 2D contact maps of ChIA-PET (CTCF and RNAPII merged) and Hi-C, respectively. ChIA-PET loops (green for CTCF and blue for RNAPII) are also presented on top of the upper diagonal area of the both ChIA-PET and Hi-C contact maps. Balanced normalization was applied to contact maps, and three different resolutions were used, 10kb (top row), 5kb (middle row), and 1kb (bottom row).

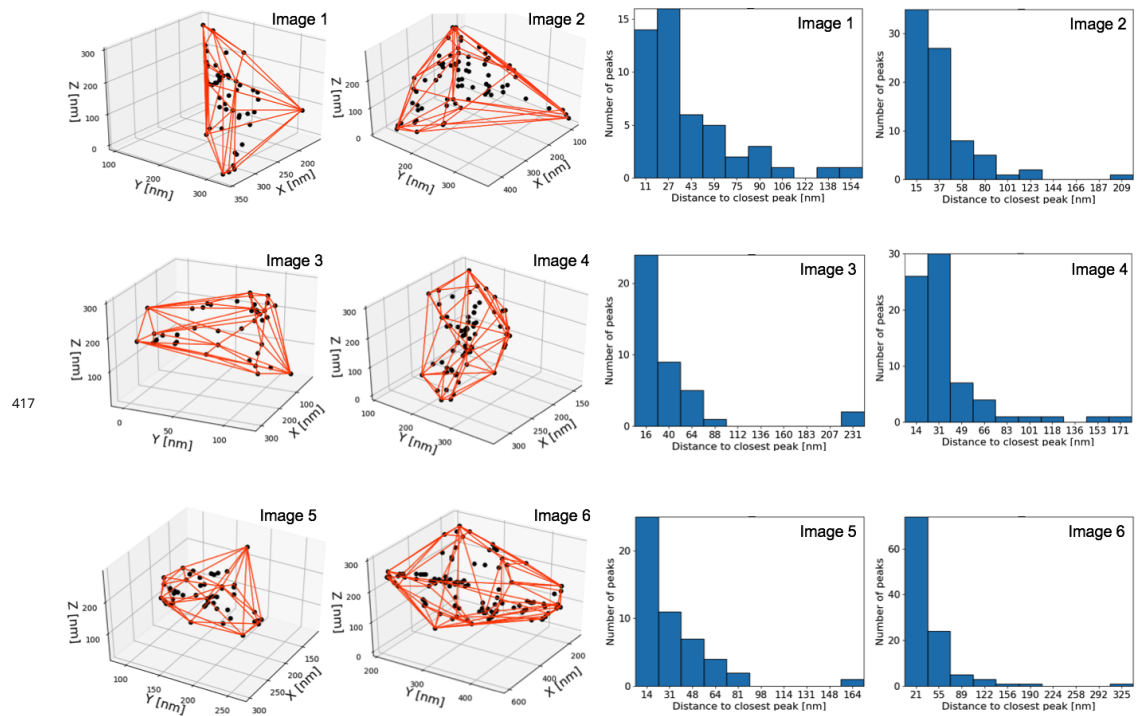

**Figure 2-Figure supplement 1.** Identified iPALM image dots for all six images. Identified dots with convex hull (red lines) and distance histogram between two closest dots for all six images.

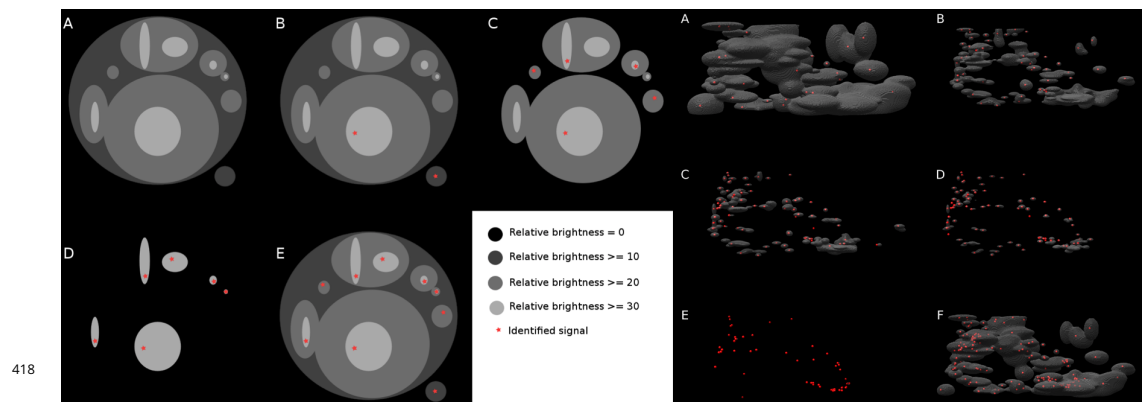

**Figure 2-Figure supplement 2.** iPALM signal processing algorithm. The left panel is a schematic illustration to extract dots from the broad signal density image. Algorithm starts from the lowest brightness level and identifies connected components (A) in each connected component the brightest voxel is identified (B) then the brightness level is changed by a step size and the connected component analysis and brightest voxel identification is repeated until reaching the maximal brightness of the image (C,D). At the end all of identified voxels are connected into one set to avoid repetitions. Intermediate processed screenshots for image 6 were shown in the right panel. Brightest voxels identification in connected components found at different peak brightness levels (A,B,C,D,E) and all identified voxels merged into one set (F).

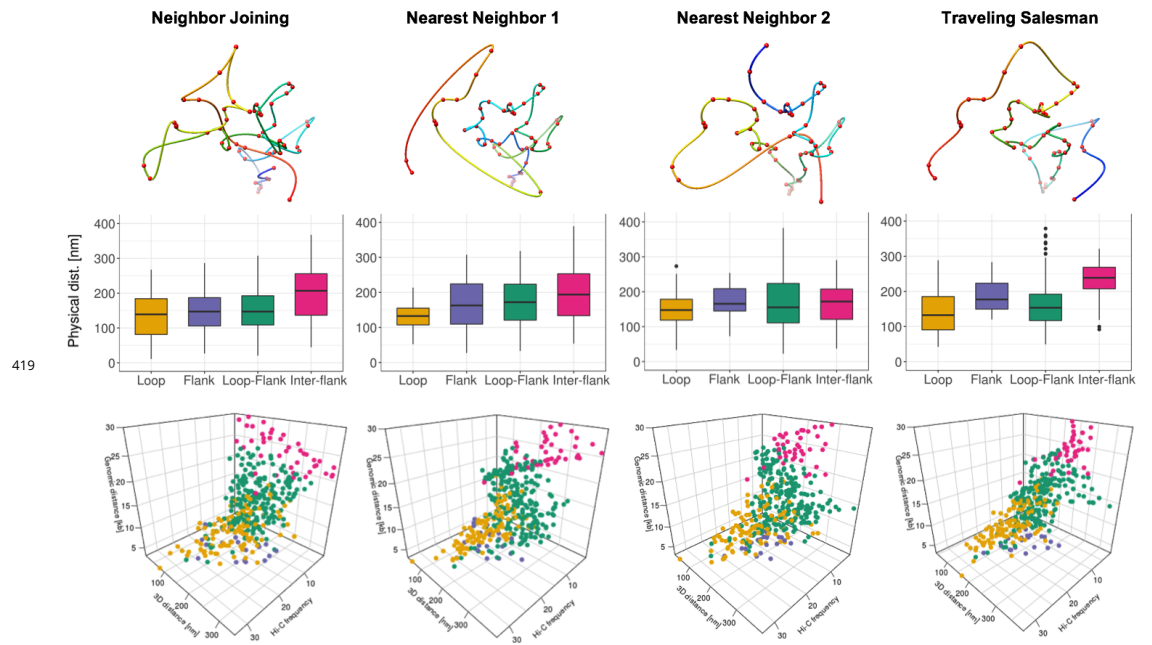

419  
**Figure 3-Figure supplement 1.** Image-driven 3D models, boxplots, and 3D scatter plots for four interaction groups (image 1).

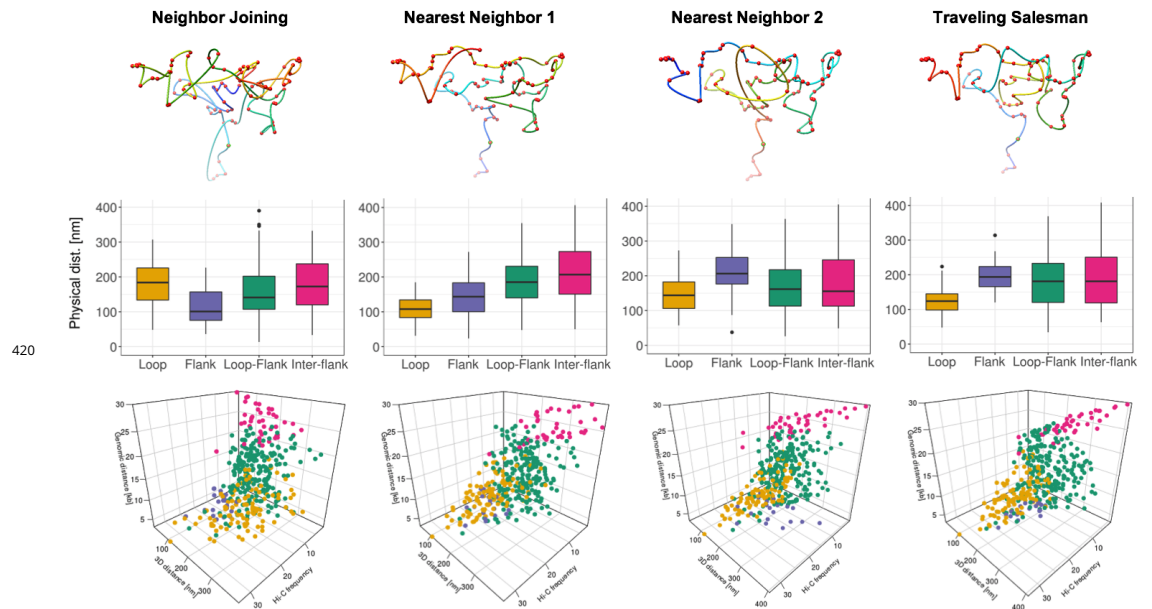

420  
**Figure 3-Figure supplement 2.** Image-driven 3D models, boxplots, and 3D scatter plots for four interaction groups (image 2).

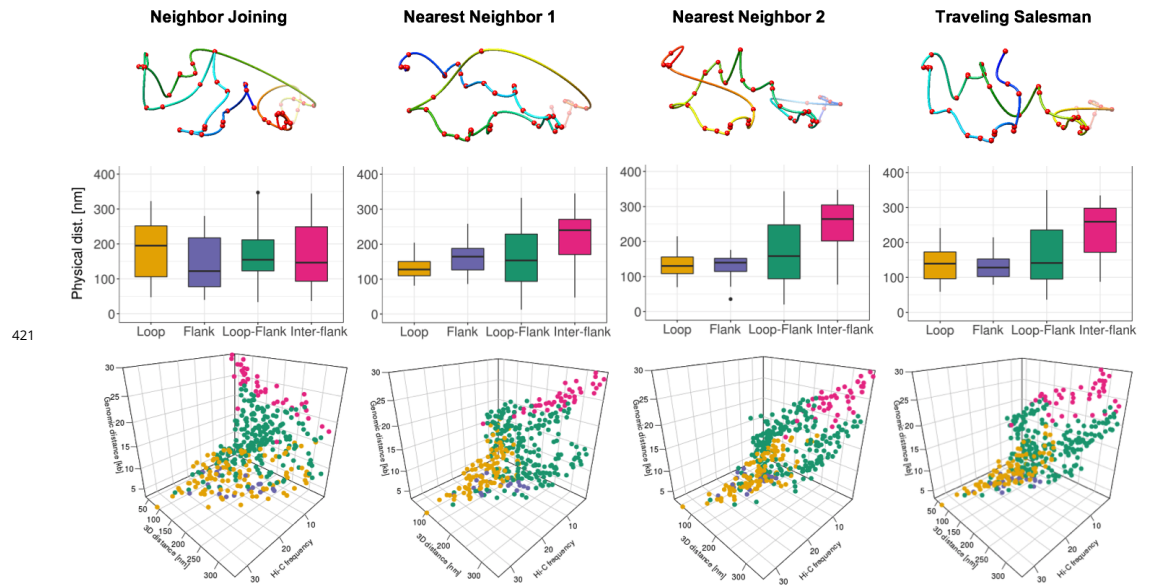

**Figure 3-Figure supplement 3.** Image-driven 3D models, boxplots, and 3D scatter plots for four interaction groups (image 3).

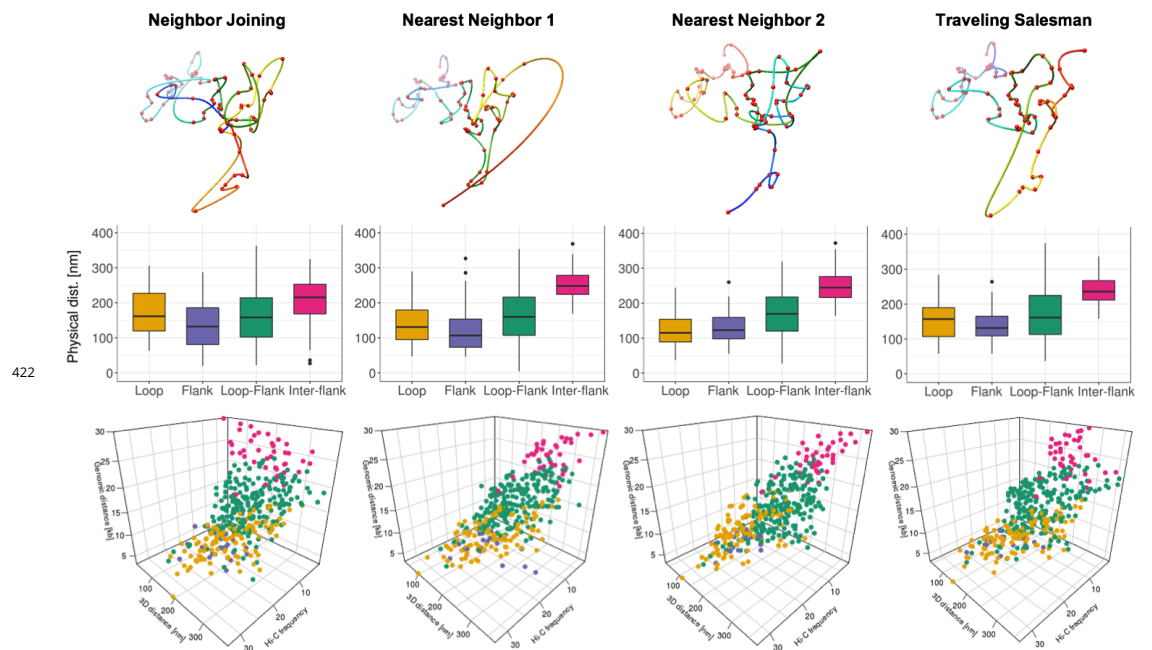

**Figure 3-Figure supplement 4.** Image-driven 3D models, boxplots, and 3D scatter plots for four interaction groups (image 4).

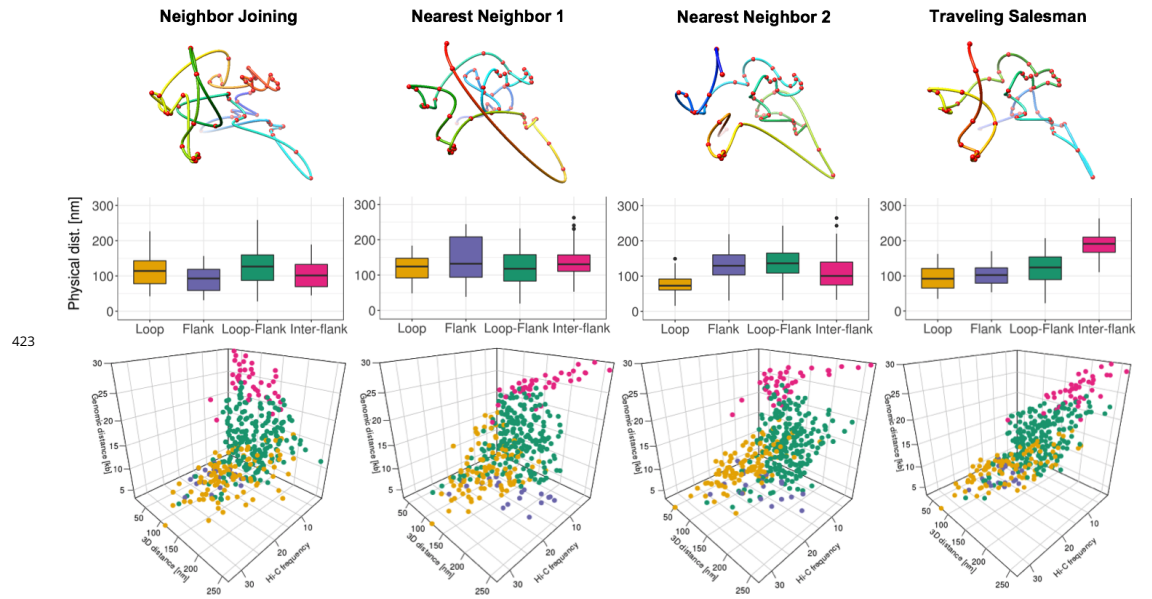

**Figure 3-Figure supplement 5.** Image-driven 3D models, boxplots, and 3D scatter plots for four interaction groups (image 5)

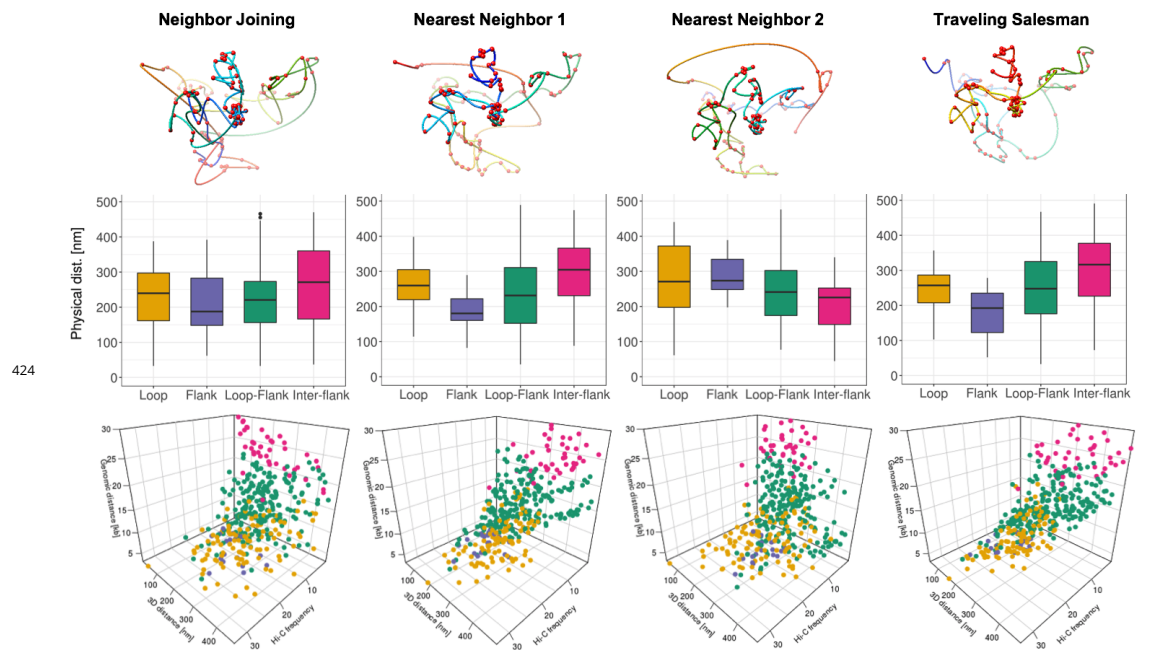

**Figure 3-Figure supplement 6.** Image-driven 3D models, boxplots, and 3D scatter plots for four interaction groups (image 6).
